# Supplementary material for: Multiple interface-induced evolution of electromagnetic patterns for efficient microwave absorption at low thickness
Source: Royal Society of Chemistry journal article supplement (doi:10.1039/d0qi01486a), 2021-01-01
Supplement: d0qi01486a1.pdf [file d0qi01486a1.pdf]

## **Multiple interfaces induced evolution of electromagnetic patterns for efficient microwave absorption at low thickness**

Yabin Ma <sup>a</sup>, Bin Quan <sup>\*a</sup>, Zhihui Zeng <sup>b</sup>, Yunke Zhang <sup>a</sup>, Lan Zhang <sup>a</sup>, Yu Wang <sup>a</sup>,  
Xiaogu Huang <sup>\*a</sup>

*<sup>a</sup> Institute of Advanced Materials and Flexible Electronics (IAMFE), School of Chemistry and Materials Science, Nanjing University of Information Science & Technology, Nanjing 210044, China.*

*<sup>b</sup> Empa, Swiss Federal Laboratories for Materials Science and Technology, Überland Strasse 129, Dübendorf 8600, Switzerland.*

\*Corresponding Author:

Prof. Dr. Bin Quan.

E-mail: [binquan@nuist.edu.cn](mailto:binquan@nuist.edu.cn)

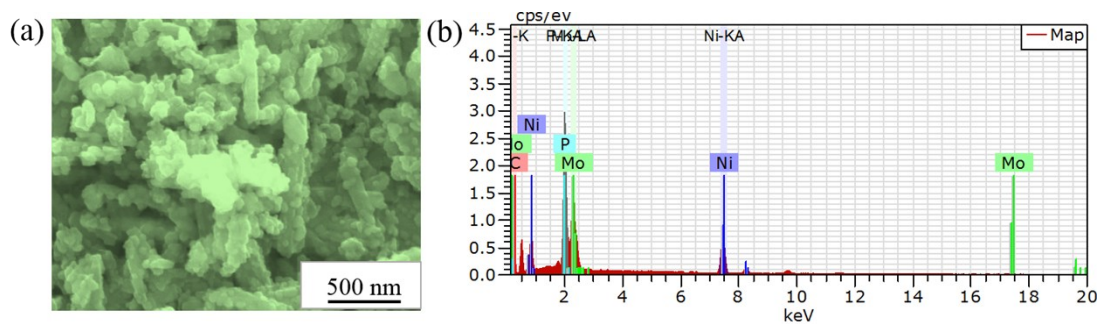

**Figure S1.** SEM- EDS spectra of (a-b) Mo-Ni<sub>2</sub>P/rGO-700.

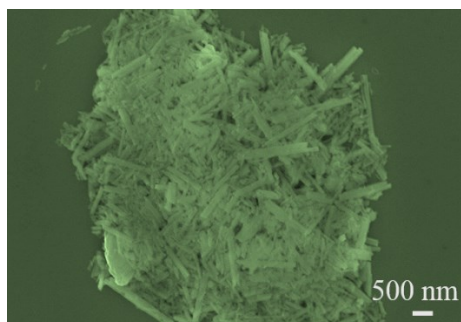

**Figure S2.** SEM image of NiMoO<sub>4</sub>/rGO precursors synthesized with 2 mL GO solution.

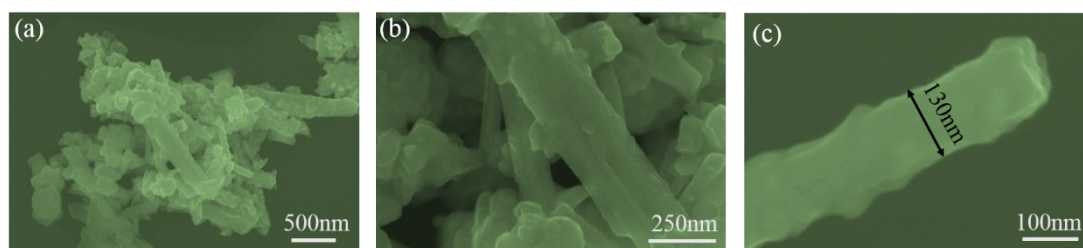

**Figure S3.** SEM images of (a-c) Mo-Ni<sub>2</sub>P/rGO-600 at different magnification factors.

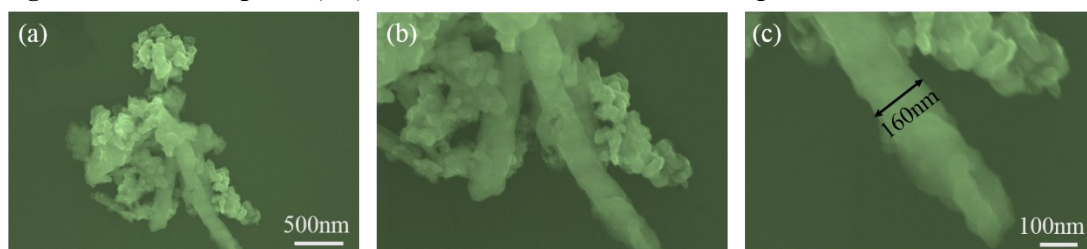

**Figure S4.** SEM images of (a-c) Mo-Ni<sub>2</sub>P/rGO-800 at different magnification factors.

**Table S1.** Microwave absorption property of the reported work and this work

|                                               | Bandwidth / GHz | Thickness / mm | Ref.      |
|-----------------------------------------------|-----------------|----------------|-----------|
| 2H-MoS <sub>2</sub> /rGO                      | 4.0             | 2.5            | 10        |
| graphene@CNTs                                 | 3.3             | 3.0            | 11        |
| CoNi-P/C-400                                  | 4.5             | 2.1            | 27        |
| CoNi-P/C-300                                  | 3.5             | 2.1            | 27        |
| PVDF/rGO                                      | 4.3             | 4.0            | 30        |
| rGO/MnFe <sub>2</sub> O <sub>4</sub>          | 4.9             | 3.0            | 31        |
| rGO/Ni                                        | 4.2             | 2.0            | 32        |
| Co/CNTs/CS                                    | 4.1             | 2.2            | 33        |
| graphene@CuS                                  | 4.5             | 2.5            | 34        |
| Co/C                                          | 3.8             | 2.0            | 35        |
| FeCo/C                                        | 5.5             | 2.4            | 36        |
| $\gamma$ -Fe <sub>2</sub> O <sub>3</sub> /rGO | 3.0             | 2.5            | 37        |
| Mo-Ni <sub>2</sub> P/rGO-700                  | 5.24            | 1.8            | This work |
| Mo-Ni <sub>2</sub> P/rGO-800                  | 3.48            | 1.2            | This work |
